# Supplementary material
Source: PubMed Central journal article supplement (PMC7898153)
Supplement: rsfs20200036supp1.pdf [file rsfs20200036supp1.pdf]

# **SUPPLEMENTARY INFORMATION**

## **Stomatal responses to carbon dioxide and light require ABA catabolism in Arabidopsis**

Mahsa Movahedi<sup>1</sup>, Nicholas Zoulias<sup>2</sup>, Stuart A. Casson<sup>2</sup>, Peng Sun<sup>3</sup>, Yun-Kuan Liang<sup>3</sup>,  
Alistair M. Hetherington<sup>4</sup>, Julie E. Gray<sup>2</sup>, Caspar C. C. Chater<sup>2, 5\*</sup>

<sup>1</sup>Clinical Biomanufacturing Facility, Old Road, Headington, Oxford OX3 7JT, UK

<sup>2</sup>Department of Molecular Biology and Biotechnology, University of Sheffield, Firth Court,  
Western Bank, Sheffield, S10 2TN, UK

<sup>3</sup>State Key Laboratory of Hybrid Rice, Department of Plant Science, College of Life  
Sciences, Wuhan University, Wuhan, China

<sup>4</sup>School of Biological Sciences, Life Sciences Building, University of Bristol, Woodland  
Road, 24 Tyndall Avenue, Bristol BS8 1TQ, UK

<sup>5</sup>Department of Natural Capital and Plant Health, Royal Botanic Gardens, Kew,  
Richmond, Surrey TW9 3AE, UK

\*Corresponding author

[Email: c.chater@kew.org](mailto:c.chater@kew.org) (CC)

## Supplementary Information

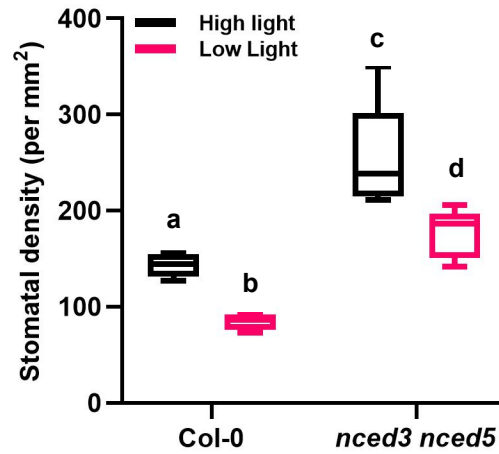

**Supplementary Fig. S1. The stomatal density response to light intensity is not altered when ABA biosynthesis is impaired.** The stomatal density response to light intensity was not impaired in the ABA biosynthesis double mutant *nced3 nced5* compared to wild-type leaves.

## Supplementary Information

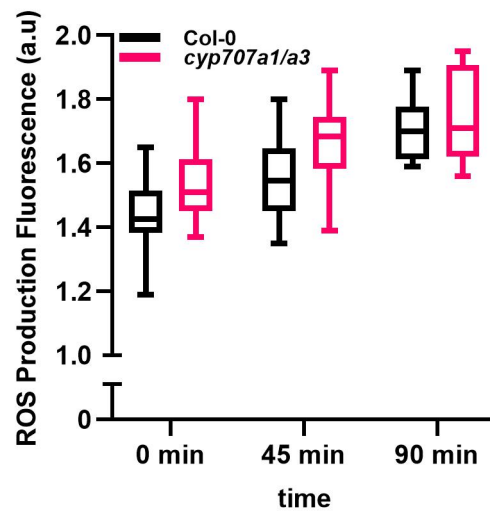

**Supplementary Fig. S2. ROS production in response to light is not significantly altered when ABA catabolism is impaired.** There is only marginally elevated reactive oxygen species (ROS) production in the *cyp707a1/a3* mutant in response to light.

## Supplementary Information

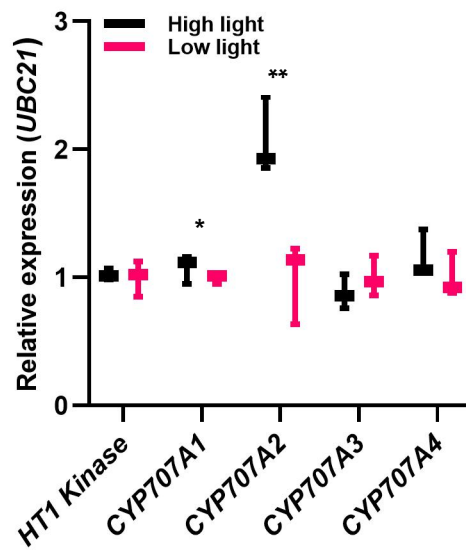

**Supplementary Fig. S3. *CYP707A1* and *CYP707A2* are upregulated in response to high light.** Differential expression analysis by quantitative RT-PCR shows upregulation of *CYP707A1* and *CYP707A2* in wild-type Col-0 in response to transfer to high light from growth at low light.

## Supplementary Information

**a**

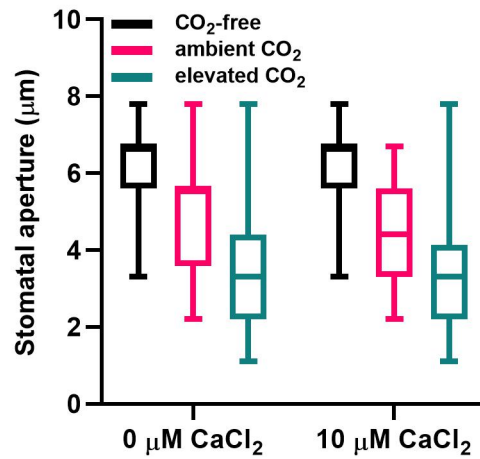

**b**

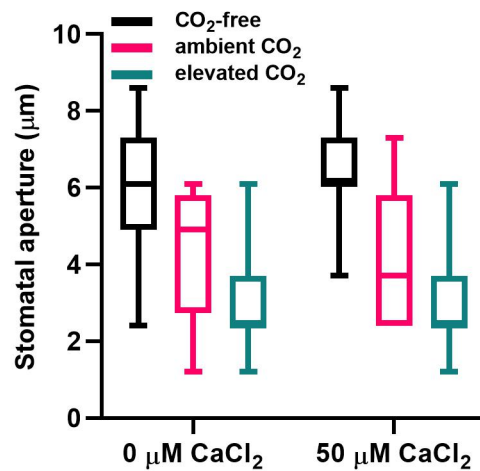

**Supplementary Fig. S4. Supplemental Calcium ions do not affect the stomatal aperture response to changes in carbon dioxide concentration.** The addition of (a) 10 µM or (b) 50 µM CaCl<sub>2</sub> to the epidermal strip buffer does not affect the stomatal aperture response to [CO<sub>2</sub>].
